# Supplementary material for: Improving sense of belonging in biomedical engineering students through student-faculty lunches
Source: Frontiers journal article supplement (doi:10.3389/feduc.2025.1510872), 2025-02-26
Supplement: Data_Sheet_1.docx [file Data_Sheet_1.docx]

Supplementary Material

# Semi-Structured Interview Script for Students

**Start of the interview:**

Prompt: Thank you for agreeing to be interviewed as part of our research! Here is the consent form for this interview. While you are reading, we will reiterate a few important points from the consent form:

- You will be compensated for $25 for this interview.
- The audio of the interview will be recorded and will not be linked to you.
- The recording of the audio will be destroyed once we have finished transcribing the recording using Otter.ai and performed manual quality checking.
- If a question is uncomfortable for you, you may choose not to answer or only partially answer the question.

Prompt: If you are ready to proceed with the interview, please give verbal consent. If you have any questions for us, please feel free to ask before we start the interview process.

**Phase 1: demographics.**

Prompt: Since our surveys are anonymized, would you please reiterate the answer to the demographic questions?

Questions:

1. Which year are you in? If you are a 4th year, are you graduating this year?
2. Could you state your gender identity?
3. Could you state your ethnic identity?
4. Are you a first generation and/or low-income student?
5. Are you an international student and/or speak English as a second language?

**Phase 2: recalling lunches.**

Questions:

1. What was your general perception towards interaction with faculties before the lunch?
2. Would you classify your interaction with the faculty (in general and during the lunch) to be positive or negative, and why?
3. Recalling the lunch now, what went well in these lunches?
4. What did not go well during these lunches?
5. Looking at the lunch now, since we had one month after you had lunch with the faculty already, did you achieve your goals for the lunch?
6. Did anything change in your general interest and attitude towards BME after you had lunch with faculty? (interest and graduation oriented)
7. Did anything change in your behavior towards BME, for example, your study habits, course selection, concentration, or research direction?

**Phase 3: specific impacts.**

Questions:

1. Did the lunch help you become more familiar with the undergraduate-focused events in our department, and why?
2. Did the lunch help you to be more satisfied with the undergraduate-oriented events in our department, and why?
3. Did the lunch help in any way for you to feel a part of the biomedical engineering/bioengineering program here, and how?
4. Did the lunch help you in selecting a concentration or formulate your study plan, which is the courses that you will take towards your graduation requirements?
5. Did the lunch help you in identifying your strengths and weaknesses in biomedical engineering/bioengineering?
6. Are you more inclined to graduate with your B.S. degree here in biomedical engineering/bioengineering due to the lunch? If so, how did the lunch help?
7. Did the lunch help in clarifying your career goals? If so, please elaborate.
8. Did you go over topics in diversity, equity, and inclusion in biomedical engineering? If so, please tell us whether going through these topics was helpful for you.

**Phase 4: feedback**

Questions:

1. Do you have any suggestions for us on how to make these lunches better?
2. Any final questions for us?

# Supplementary Data: Printouts for Regression Analysis

Pre-survey OLS Results for Question 1 OLS Regression Results

==============================================================================

Dep. Variable: y R-squared: 0.396

Model: OLS Adj. R-squared: 0.313

Method: Least Squares F-statistic: 4.729

Date: Mon, 23 Sep 2024 Prob (F-statistic): 0.00202

Time: 18:54:30 Log-Likelihood: -53.679

No. Observations: 42 AIC: 119.4

Df Residuals: 36 BIC: 129.8

Df Model: 5

Covariance Type: nonrobust

==============================================================================

coef std err t P>|t| [0.025 0.975]

------------------------------------------------------------------------------

Intercept 1.9308 0.489 3.947 0.000 0.939 2.923

Asian 1.0563 0.360 2.934 0.006 0.326 1.786

Year 1.2796 0.529 2.421 0.021 0.208 2.351

URM -0.5919 0.487 -1.215 0.232 -1.580 0.396

Winter 0.7662 0.416 1.843 0.074 -0.077 1.610

Spring 0.3807 0.393 0.968 0.339 -0.417 1.178

==============================================================================

Omnibus: 2.102 Durbin-Watson: 1.970

Prob(Omnibus): 0.350 Jarque-Bera (JB): 1.939

Skew: -0.500 Prob(JB): 0.379

Kurtosis: 2.672 Cond. No. 7.20

==============================================================================

Notes:

[1] Standard Errors assume that the covariance matrix of the errors is correctly specified.

Post-survey OLS Results for Question 1 OLS Regression Results

==============================================================================

Dep. Variable: y R-squared: 0.319

Model: OLS Adj. R-squared: 0.179

Method: Least Squares F-statistic: 2.273

Date: Mon, 23 Sep 2024 Prob (F-statistic): 0.0519

Time: 18:54:30 Log-Likelihood: -22.374

No. Observations: 42 AIC: 60.75

Df Residuals: 34 BIC: 74.65

Df Model: 7

Covariance Type: nonrobust

===============================================================================

coef std err t P>|t| [0.025 0.975]

-------------------------------------------------------------------------------

Intercept 3.6853 0.217 17.004 0.000 3.245 4.126

Winter 0.3920 0.177 2.213 0.034 0.032 0.752

Mid qtr 0.5866 0.243 2.414 0.021 0.093 1.081

Late qtr 0.4164 0.220 1.894 0.067 -0.030 0.863

Rank (Fac) -0.4588 0.247 -1.858 0.072 -0.961 0.043

Year -0.3899 0.277 -1.408 0.168 -0.952 0.173

Female 0.3510 0.174 2.012 0.052 -0.004 0.706

Asian 0.1288 0.197 0.655 0.517 -0.271 0.528

==============================================================================

Omnibus: 1.073 Durbin-Watson: 2.668

Prob(Omnibus): 0.585 Jarque-Bera (JB): 1.079

Skew: 0.343 Prob(JB): 0.583

Kurtosis: 2.619 Cond. No. 9.31

==============================================================================

Notes:

[1] Standard Errors assume that the covariance matrix of the errors is correctly specified.

Improvement OLS Results for Question 1 OLS Regression Results

==============================================================================

Dep. Variable: y R-squared: 0.434

Model: OLS Adj. R-squared: 0.296

Method: Least Squares F-statistic: 3.159

Date: Mon, 23 Sep 2024 Prob (F-statistic): 0.00908

Time: 18:54:30 Log-Likelihood: -52.529

No. Observations: 42 AIC: 123.1

Df Residuals: 33 BIC: 138.7

Df Model: 8

Covariance Type: nonrobust

===============================================================================

coef std err t P>|t| [0.025 0.975]

-------------------------------------------------------------------------------

Intercept 1.2781 0.479 2.667 0.012 0.303 2.253

Year -1.9008 0.599 -3.174 0.003 -3.119 -0.682

URM 0.6518 0.502 1.298 0.203 -0.370 1.673

Asian -1.1611 0.434 -2.673 0.012 -2.045 -0.277

Female 0.8009 0.353 2.266 0.030 0.082 1.520

Mid qtr 1.2237 0.500 2.447 0.020 0.206 2.241

Late qtr 0.7010 0.456 1.537 0.134 -0.227 1.629

Rank (Fac) -0.6952 0.494 -1.408 0.168 -1.700 0.309

Spring -0.2399 0.337 -0.711 0.482 -0.926 0.446

==============================================================================

Omnibus: 5.232 Durbin-Watson: 2.142

Prob(Omnibus): 0.073 Jarque-Bera (JB): 2.583

Skew: 0.339 Prob(JB): 0.275

Kurtosis: 1.992 Cond. No. 9.67

==============================================================================

Notes:

[1] Standard Errors assume that the covariance matrix of the errors is correctly specified.

Pre-survey OLS Results for Question 2 OLS Regression Results

==============================================================================

Dep. Variable: y R-squared: 0.186

Model: OLS Adj. R-squared: 0.144

Method: Least Squares F-statistic: 4.460

Date: Mon, 23 Sep 2024 Prob (F-statistic): 0.0180

Time: 18:54:30 Log-Likelihood: -47.732

No. Observations: 42 AIC: 101.5

Df Residuals: 39 BIC: 106.7

Df Model: 2

Covariance Type: nonrobust

==============================================================================

coef std err t P>|t| [0.025 0.975]

------------------------------------------------------------------------------

Intercept 3.3880 0.150 22.535 0.000 3.084 3.692

URM -1.0841 0.374 -2.901 0.006 -1.840 -0.328

Winter 0.2403 0.262 0.918 0.364 -0.289 0.770

==============================================================================

Omnibus: 0.054 Durbin-Watson: 1.928

Prob(Omnibus): 0.973 Jarque-Bera (JB): 0.162

Skew: 0.077 Prob(JB): 0.922

Kurtosis: 2.739 Cond. No. 3.32

==============================================================================

Notes:

[1] Standard Errors assume that the covariance matrix of the errors is correctly specified.

Post-survey OLS Results for Question 2 OLS Regression Results

==============================================================================

Dep. Variable: y R-squared: 0.411

Model: OLS Adj. R-squared: 0.268

Method: Least Squares F-statistic: 2.877

Date: Mon, 23 Sep 2024 Prob (F-statistic): 0.0152

Time: 18:54:30 Log-Likelihood: -32.802

No. Observations: 42 AIC: 83.60

Df Residuals: 33 BIC: 99.24

Df Model: 8

Covariance Type: nonrobust

================================================================================

coef std err t P>|t| [0.025 0.975]

--------------------------------------------------------------------------------

Intercept 4.2994 0.356 12.077 0.000 3.575 5.024

URM -0.7424 0.305 -2.435 0.020 -1.363 -0.122

Winter 0.5315 0.282 1.883 0.069 -0.043 1.106

Rank (Fac) -0.7988 0.323 -2.476 0.019 -1.455 -0.142

Gender match -0.4984 0.243 -2.049 0.048 -0.993 -0.004

Female (Fac) 0.5702 0.279 2.046 0.049 0.003 1.137

Female -0.2432 0.226 -1.076 0.290 -0.703 0.217

Mid qtr 0.2339 0.221 1.059 0.297 -0.216 0.683

Spring 0.1239 0.268 0.461 0.648 -0.422 0.670

==============================================================================

Omnibus: 0.365 Durbin-Watson: 2.403

Prob(Omnibus): 0.833 Jarque-Bera (JB): 0.059

Skew: -0.086 Prob(JB): 0.971

Kurtosis: 3.064 Cond. No. 8.50

==============================================================================

Notes:

[1] Standard Errors assume that the covariance matrix of the errors is correctly specified.

Improvement OLS Results for Question 2 OLS Regression Results

==============================================================================

Dep. Variable: y R-squared: 0.268

Model: OLS Adj. R-squared: 0.117

Method: Least Squares F-statistic: 1.779

Date: Mon, 23 Sep 2024 Prob (F-statistic): 0.124

Time: 18:54:30 Log-Likelihood: -52.315

No. Observations: 42 AIC: 120.6

Df Residuals: 34 BIC: 134.5

Df Model: 7

Covariance Type: nonrobust

================================================================================

coef std err t P>|t| [0.025 0.975]

--------------------------------------------------------------------------------

Intercept 1.8950 0.548 3.459 0.001 0.782 3.008

Year -0.5532 0.561 -0.986 0.331 -1.693 0.587

Gender match -0.7219 0.375 -1.927 0.062 -1.483 0.039

Asian -0.5858 0.378 -1.551 0.130 -1.353 0.182

Spring -0.4615 0.358 -1.288 0.207 -1.190 0.267

Rank (Fac) -0.7773 0.493 -1.578 0.124 -1.778 0.224

Mid qtr 0.5088 0.353 1.443 0.158 -0.208 1.225

Female (Fac) 0.3372 0.454 0.743 0.462 -0.585 1.259

==============================================================================

Omnibus: 3.915 Durbin-Watson: 2.326

Prob(Omnibus): 0.141 Jarque-Bera (JB): 2.697

Skew: 0.473 Prob(JB): 0.260

Kurtosis: 3.803 Cond. No. 8.63

==============================================================================

Notes:

[1] Standard Errors assume that the covariance matrix of the errors is correctly specified.

Pre-survey OLS Results for Question 3 OLS Regression Results

==============================================================================

Dep. Variable: y R-squared: 0.109

Model: OLS Adj. R-squared: 0.063

Method: Least Squares F-statistic: 2.382

Date: Mon, 23 Sep 2024 Prob (F-statistic): 0.106

Time: 18:54:30 Log-Likelihood: -45.917

No. Observations: 42 AIC: 97.83

Df Residuals: 39 BIC: 103.0

Df Model: 2

Covariance Type: nonrobust

==============================================================================

coef std err t P>|t| [0.025 0.975]

------------------------------------------------------------------------------

Intercept 3.1901 0.269 11.872 0.000 2.647 3.734

Asian 0.5472 0.271 2.016 0.051 -0.002 1.096

Year 0.3298 0.380 0.867 0.391 -0.439 1.099

==============================================================================

Omnibus: 1.814 Durbin-Watson: 1.792

Prob(Omnibus): 0.404 Jarque-Bera (JB): 1.433

Skew: -0.450 Prob(JB): 0.488

Kurtosis: 2.914 Cond. No. 4.83

==============================================================================

Notes:

[1] Standard Errors assume that the covariance matrix of the errors is correctly specified.

Post-survey OLS Results for Question 3 OLS Regression Results

==============================================================================

Dep. Variable: y R-squared: 0.219

Model: OLS Adj. R-squared: 0.135

Method: Least Squares F-statistic: 2.600

Date: Mon, 23 Sep 2024 Prob (F-statistic): 0.0517

Time: 18:54:30 Log-Likelihood: -23.441

No. Observations: 42 AIC: 56.88

Df Residuals: 37 BIC: 65.57

Df Model: 4

Covariance Type: nonrobust

===============================================================================

coef std err t P>|t| [0.025 0.975]

-------------------------------------------------------------------------------

Intercept 4.1726 0.146 28.533 0.000 3.876 4.469

Winter 0.3647 0.169 2.159 0.037 0.022 0.707

Mid qtr 0.3418 0.154 2.215 0.033 0.029 0.654

Rank (Fac) -0.2929 0.210 -1.397 0.171 -0.718 0.132

Year -0.2245 0.248 -0.904 0.372 -0.728 0.279

==============================================================================

Omnibus: 0.408 Durbin-Watson: 1.753

Prob(Omnibus): 0.815 Jarque-Bera (JB): 0.033

Skew: -0.031 Prob(JB): 0.984

Kurtosis: 3.123 Cond. No. 5.04

==============================================================================

Notes:

[1] Standard Errors assume that the covariance matrix of the errors is correctly specified.

Improvement OLS Results for Question 3 OLS Regression Results

==============================================================================

Dep. Variable: y R-squared: 0.291

Model: OLS Adj. R-squared: 0.193

Method: Least Squares F-statistic: 2.958

Date: Mon, 23 Sep 2024 Prob (F-statistic): 0.0245

Time: 18:54:30 Log-Likelihood: -35.124

No. Observations: 42 AIC: 82.25

Df Residuals: 36 BIC: 92.67

Df Model: 5

Covariance Type: nonrobust

================================================================================

coef std err t P>|t| [0.025 0.975]

--------------------------------------------------------------------------------

Intercept 1.1084 0.291 3.814 0.001 0.519 1.698

Year -0.5401 0.322 -1.677 0.102 -1.193 0.113

Female -0.3608 0.209 -1.728 0.093 -0.784 0.063

Asian -0.5221 0.234 -2.229 0.032 -0.997 -0.047

Mid qtr 0.3442 0.220 1.566 0.126 -0.102 0.790

Gender match 0.1796 0.203 0.883 0.383 -0.233 0.592

==============================================================================

Omnibus: 0.195 Durbin-Watson: 1.495

Prob(Omnibus): 0.907 Jarque-Bera (JB): 0.036

Skew: -0.069 Prob(JB): 0.982

Kurtosis: 2.961 Cond. No. 6.61

==============================================================================

Notes:

[1] Standard Errors assume that the covariance matrix of the errors is correctly specified.

Pre-survey OLS Results for Question 4 OLS Regression Results

==============================================================================

Dep. Variable: y R-squared: 0.127

Model: OLS Adj. R-squared: 0.082

Method: Least Squares F-statistic: 2.834

Date: Mon, 23 Sep 2024 Prob (F-statistic): 0.0709

Time: 18:54:30 Log-Likelihood: -50.973

No. Observations: 42 AIC: 107.9

Df Residuals: 39 BIC: 113.2

Df Model: 2

Covariance Type: nonrobust

==============================================================================

coef std err t P>|t| [0.025 0.975]

------------------------------------------------------------------------------

Intercept 3.6435 0.203 17.917 0.000 3.232 4.055

URM -0.8939 0.407 -2.194 0.034 -1.718 -0.070

Year 0.2520 0.434 0.581 0.565 -0.625 1.129

==============================================================================

Omnibus: 3.386 Durbin-Watson: 1.533

Prob(Omnibus): 0.184 Jarque-Bera (JB): 2.890

Skew: -0.641 Prob(JB): 0.236

Kurtosis: 2.912 Cond. No. 3.92

==============================================================================

Notes:

[1] Standard Errors assume that the covariance matrix of the errors is correctly specified.

Post-survey OLS Results for Question 4 OLS Regression Results

==============================================================================

Dep. Variable: y R-squared: 0.323

Model: OLS Adj. R-squared: 0.229

Method: Least Squares F-statistic: 3.434

Date: Mon, 23 Sep 2024 Prob (F-statistic): 0.0122

Time: 18:54:30 Log-Likelihood: -33.501

No. Observations: 42 AIC: 79.00

Df Residuals: 36 BIC: 89.43

Df Model: 5

Covariance Type: nonrobust

================================================================================

coef std err t P>|t| [0.025 0.975]

--------------------------------------------------------------------------------

Intercept 4.4454 0.297 14.944 0.000 3.842 5.049

URM -0.6039 0.300 -2.016 0.051 -1.212 0.004

Winter 0.5218 0.214 2.436 0.020 0.087 0.956

Female (Fac) -0.5717 0.224 -2.552 0.015 -1.026 -0.117

Year -0.5332 0.355 -1.504 0.141 -1.252 0.186

Asian -0.2154 0.225 -0.956 0.346 -0.673 0.242

==============================================================================

Omnibus: 0.111 Durbin-Watson: 1.784

Prob(Omnibus): 0.946 Jarque-Bera (JB): 0.129

Skew: 0.100 Prob(JB): 0.937

Kurtosis: 2.816 Cond. No. 7.33

==============================================================================

Notes:

[1] Standard Errors assume that the covariance matrix of the errors is correctly specified.

Improvement OLS Results for Question 4 OLS Regression Results

==============================================================================

Dep. Variable: y R-squared: 0.368

Model: OLS Adj. R-squared: 0.260

Method: Least Squares F-statistic: 3.399

Date: Mon, 23 Sep 2024 Prob (F-statistic): 0.00953

Time: 18:54:30 Log-Likelihood: -37.611

No. Observations: 42 AIC: 89.22

Df Residuals: 35 BIC: 101.4

Df Model: 6

Covariance Type: nonrobust

================================================================================

coef std err t P>|t| [0.025 0.975]

--------------------------------------------------------------------------------

Intercept 0.7826 0.343 2.282 0.029 0.086 1.479

Year -1.0713 0.386 -2.776 0.009 -1.855 -0.288

Late qtr 1.1572 0.340 3.401 0.002 0.466 1.848

Asian -0.7852 0.273 -2.874 0.007 -1.340 -0.231

Mid qtr 0.8846 0.362 2.443 0.020 0.150 1.620

Rank (Fac) -0.6178 0.345 -1.793 0.082 -1.317 0.082

Female (Fac) 0.1180 0.293 0.403 0.689 -0.477 0.713

==============================================================================

Omnibus: 0.147 Durbin-Watson: 2.063

Prob(Omnibus): 0.929 Jarque-Bera (JB): 0.328

Skew: 0.104 Prob(JB): 0.849

Kurtosis: 2.620 Cond. No. 8.83

==============================================================================

Notes:

[1] Standard Errors assume that the covariance matrix of the errors is correctly specified.

Pre-survey OLS Results for Question 5 OLS Regression Results

==============================================================================

Dep. Variable: y R-squared: 0.303

Model: OLS Adj. R-squared: 0.227

Method: Least Squares F-statistic: 4.014

Date: Mon, 23 Sep 2024 Prob (F-statistic): 0.00839

Time: 18:54:30 Log-Likelihood: -51.064

No. Observations: 42 AIC: 112.1

Df Residuals: 37 BIC: 120.8

Df Model: 4

Covariance Type: nonrobust

==============================================================================

coef std err t P>|t| [0.025 0.975]

------------------------------------------------------------------------------

Intercept 2.9989 0.402 7.454 0.000 2.184 3.814

Year 1.5353 0.497 3.089 0.004 0.528 2.542

Female -0.6355 0.301 -2.110 0.042 -1.246 -0.025

Winter 0.7225 0.394 1.833 0.075 -0.076 1.521

Spring 0.2233 0.367 0.608 0.547 -0.521 0.968

==============================================================================

Omnibus: 1.441 Durbin-Watson: 1.611

Prob(Omnibus): 0.487 Jarque-Bera (JB): 1.410

Skew: -0.395 Prob(JB): 0.494

Kurtosis: 2.573 Cond. No. 6.36

==============================================================================

Notes:

[1] Standard Errors assume that the covariance matrix of the errors is correctly specified.

Post-survey OLS Results for Question 5 OLS Regression Results

==============================================================================

Dep. Variable: y R-squared: 0.286

Model: OLS Adj. R-squared: 0.164

Method: Least Squares F-statistic: 2.340

Date: Mon, 23 Sep 2024 Prob (F-statistic): 0.0527

Time: 18:54:30 Log-Likelihood: -37.426

No. Observations: 42 AIC: 88.85

Df Residuals: 35 BIC: 101.0

Df Model: 6

Covariance Type: nonrobust

===============================================================================

coef std err t P>|t| [0.025 0.975]

-------------------------------------------------------------------------------

Intercept 3.8268 0.291 13.135 0.000 3.235 4.418

Winter 0.5480 0.244 2.249 0.031 0.053 1.043

Rank (Fac) -0.6610 0.337 -1.960 0.058 -1.346 0.024

Mid qtr 0.7358 0.319 2.309 0.027 0.089 1.383

Late qtr 0.5740 0.289 1.985 0.055 -0.013 1.161

Asian -0.3333 0.271 -1.230 0.227 -0.884 0.217

Female -0.2118 0.236 -0.899 0.375 -0.690 0.267

==============================================================================

Omnibus: 3.043 Durbin-Watson: 2.214

Prob(Omnibus): 0.218 Jarque-Bera (JB): 2.389

Skew: -0.584 Prob(JB): 0.303

Kurtosis: 3.043 Cond. No. 8.13

==============================================================================

Notes:

[1] Standard Errors assume that the covariance matrix of the errors is correctly specified.

Improvement OLS Results for Question 5 OLS Regression Results

==============================================================================

Dep. Variable: y R-squared: 0.129

Model: OLS Adj. R-squared: 0.085

Method: Least Squares F-statistic: 2.896

Date: Mon, 23 Sep 2024 Prob (F-statistic): 0.0672

Time: 18:54:30 Log-Likelihood: -51.055

No. Observations: 42 AIC: 108.1

Df Residuals: 39 BIC: 113.3

Df Model: 2

Covariance Type: nonrobust

================================================================================

coef std err t P>|t| [0.025 0.975]

--------------------------------------------------------------------------------

Intercept 0.5885 0.286 2.057 0.046 0.010 1.167

Year -0.8295 0.498 -1.667 0.103 -1.836 0.177

Female (Fac) 0.2010 0.306 0.657 0.515 -0.418 0.820

==============================================================================

Omnibus: 1.531 Durbin-Watson: 1.568

Prob(Omnibus): 0.465 Jarque-Bera (JB): 0.731

Skew: -0.265 Prob(JB): 0.694

Kurtosis: 3.369 Cond. No. 5.15

==============================================================================

Notes:

[1] Standard Errors assume that the covariance matrix of the errors is correctly specified.

Pre-survey OLS Results for Question 6 OLS Regression Results

==============================================================================

Dep. Variable: y R-squared: 0.315

Model: OLS Adj. R-squared: 0.241

Method: Least Squares F-statistic: 4.261

Date: Mon, 23 Sep 2024 Prob (F-statistic): 0.00617

Time: 18:54:30 Log-Likelihood: -41.664

No. Observations: 42 AIC: 93.33

Df Residuals: 37 BIC: 102.0

Df Model: 4

Covariance Type: nonrobust

==============================================================================

coef std err t P>|t| [0.025 0.975]

------------------------------------------------------------------------------

Intercept 3.5541 0.210 16.916 0.000 3.128 3.980

Year 0.8765 0.369 2.376 0.023 0.129 1.624

Mid qtr 0.7039 0.261 2.696 0.011 0.175 1.233

Late qtr 0.4128 0.281 1.469 0.150 -0.157 0.982

URM 0.3065 0.336 0.913 0.367 -0.373 0.986

==============================================================================

Omnibus: 2.322 Durbin-Watson: 1.556

Prob(Omnibus): 0.313 Jarque-Bera (JB): 1.936

Skew: -0.393 Prob(JB): 0.380

Kurtosis: 2.300 Cond. No. 4.42

==============================================================================

Notes:

[1] Standard Errors assume that the covariance matrix of the errors is correctly specified.

Post-survey OLS Results for Question 6 OLS Regression Results

==============================================================================

Dep. Variable: y R-squared: 0.263

Model: OLS Adj. R-squared: 0.205

Method: Least Squares F-statistic: 4.529

Date: Mon, 23 Sep 2024 Prob (F-statistic): 0.00824

Time: 18:54:30 Log-Likelihood: -27.076

No. Observations: 42 AIC: 62.15

Df Residuals: 38 BIC: 69.10

Df Model: 3

Covariance Type: nonrobust

================================================================================

coef std err t P>|t| [0.025 0.975]

--------------------------------------------------------------------------------

Intercept 4.3028 0.189 22.727 0.000 3.920 4.686

Late qtr 0.5587 0.213 2.627 0.012 0.128 0.989

Mid qtr 0.4754 0.201 2.367 0.023 0.069 0.882

Female (Fac) -0.1127 0.176 -0.641 0.525 -0.468 0.243

==============================================================================

Omnibus: 3.831 Durbin-Watson: 2.218

Prob(Omnibus): 0.147 Jarque-Bera (JB): 3.109

Skew: -0.665 Prob(JB): 0.211

Kurtosis: 3.072 Cond. No. 5.34

==============================================================================

Notes:

[1] Standard Errors assume that the covariance matrix of the errors is correctly specified.

Improvement OLS Results for Question 6 OLS Regression Results

==============================================================================

Dep. Variable: y R-squared: 0.307

Model: OLS Adj. R-squared: 0.211

Method: Least Squares F-statistic: 3.190

Date: Mon, 23 Sep 2024 Prob (F-statistic): 0.0174

Time: 18:54:30 Log-Likelihood: -33.309

No. Observations: 42 AIC: 78.62

Df Residuals: 36 BIC: 89.04

Df Model: 5

Covariance Type: nonrobust

================================================================================

coef std err t P>|t| [0.025 0.975]

--------------------------------------------------------------------------------

Intercept 0.5914 0.242 2.443 0.020 0.100 1.082

Year -0.9277 0.313 -2.960 0.005 -1.563 -0.292

URM -0.4989 0.289 -1.724 0.093 -1.086 0.088

Rank (Fac) -0.2170 0.274 -0.792 0.434 -0.773 0.339

Late qtr 0.2873 0.201 1.428 0.162 -0.121 0.695

Gender match 0.1801 0.207 0.868 0.391 -0.241 0.601

==============================================================================

Omnibus: 1.356 Durbin-Watson: 1.646

Prob(Omnibus): 0.508 Jarque-Bera (JB): 0.712

Skew: 0.302 Prob(JB): 0.700

Kurtosis: 3.208 Cond. No. 5.98

==============================================================================

Notes:

[1] Standard Errors assume that the covariance matrix of the errors is correctly specified.

Pre-survey OLS Results for Question 7 OLS Regression Results

==============================================================================

Dep. Variable: y R-squared: 0.114

Model: OLS Adj. R-squared: -0.009

Method: Least Squares F-statistic: 0.9297

Date: Mon, 23 Sep 2024 Prob (F-statistic): 0.473

Time: 18:54:30 Log-Likelihood: -57.702

No. Observations: 42 AIC: 127.4

Df Residuals: 36 BIC: 137.8

Df Model: 5

Covariance Type: nonrobust

==============================================================================

coef std err t P>|t| [0.025 0.975]

------------------------------------------------------------------------------

Intercept 2.4481 0.538 4.547 0.000 1.356 3.540

Asian 0.5836 0.396 1.473 0.149 -0.220 1.387

URM 0.5966 0.536 1.113 0.273 -0.490 1.684

Winter 0.6446 0.458 1.409 0.168 -0.284 1.573

Spring 0.4369 0.433 1.010 0.319 -0.441 1.315

Year -0.1166 0.582 -0.200 0.842 -1.296 1.063

==============================================================================

Omnibus: 9.162 Durbin-Watson: 1.751

Prob(Omnibus): 0.010 Jarque-Bera (JB): 2.678

Skew: -0.153 Prob(JB): 0.262

Kurtosis: 1.802 Cond. No. 7.20

==============================================================================

Notes:

[1] Standard Errors assume that the covariance matrix of the errors is correctly specified.

Post-survey OLS Results for Question 7 OLS Regression Results

==============================================================================

Dep. Variable: y R-squared: 0.077

Model: OLS Adj. R-squared: 0.030

Method: Least Squares F-statistic: 1.635

Date: Mon, 23 Sep 2024 Prob (F-statistic): 0.208

Time: 18:54:30 Log-Likelihood: -44.708

No. Observations: 42 AIC: 95.42

Df Residuals: 39 BIC: 100.6

Df Model: 2

Covariance Type: nonrobust

==============================================================================

coef std err t P>|t| [0.025 0.975]

------------------------------------------------------------------------------

Intercept 4.2265 0.225 18.803 0.000 3.772 4.681

Female -0.3988 0.238 -1.673 0.102 -0.881 0.083

Spring -0.1672 0.225 -0.743 0.462 -0.622 0.288

==============================================================================

Omnibus: 3.251 Durbin-Watson: 1.775

Prob(Omnibus): 0.197 Jarque-Bera (JB): 2.313

Skew: -0.559 Prob(JB): 0.315

Kurtosis: 3.267 Cond. No. 3.74

==============================================================================

Notes:

[1] Standard Errors assume that the covariance matrix of the errors is correctly specified.

Improvement OLS Results for Question 7 OLS Regression Results

==============================================================================

Dep. Variable: y R-squared: 0.174

Model: OLS Adj. R-squared: 0.085

Method: Least Squares F-statistic: 1.951

Date: Mon, 23 Sep 2024 Prob (F-statistic): 0.122

Time: 18:54:30 Log-Likelihood: -45.830

No. Observations: 42 AIC: 101.7

Df Residuals: 37 BIC: 110.3

Df Model: 4

Covariance Type: nonrobust

==============================================================================

coef std err t P>|t| [0.025 0.975]

------------------------------------------------------------------------------

Intercept 1.4619 0.360 4.058 0.000 0.732 2.192

Winter -0.8683 0.347 -2.504 0.017 -1.571 -0.166

Spring -0.6600 0.322 -2.049 0.048 -1.313 -0.007

Female -0.4400 0.262 -1.682 0.101 -0.970 0.090

URM -0.3186 0.376 -0.847 0.402 -1.080 0.443

==============================================================================

Omnibus: 1.141 Durbin-Watson: 1.562

Prob(Omnibus): 0.565 Jarque-Bera (JB): 1.010

Skew: 0.172 Prob(JB): 0.604

Kurtosis: 2.323 Cond. No. 6.45

==============================================================================

Notes:

[1] Standard Errors assume that the covariance matrix of the errors is correctly specified.

Pre-survey OLS Results for Question 8 OLS Regression Results

==============================================================================

Dep. Variable: y R-squared: 0.020

Model: OLS Adj. R-squared: -0.005

Method: Least Squares F-statistic: 0.8061

Date: Mon, 23 Sep 2024 Prob (F-statistic): 0.375

Time: 18:54:30 Log-Likelihood: -59.129

No. Observations: 42 AIC: 122.3

Df Residuals: 40 BIC: 125.7

Df Model: 1

Covariance Type: nonrobust

==============================================================================

coef std err t P>|t| [0.025 0.975]

------------------------------------------------------------------------------

Intercept 3.2308 0.229 14.110 0.000 2.768 3.694

Year 0.4615 0.514 0.898 0.375 -0.577 1.500

==============================================================================

Omnibus: 5.154 Durbin-Watson: 2.362

Prob(Omnibus): 0.076 Jarque-Bera (JB): 1.963

Skew: 0.043 Prob(JB): 0.375

Kurtosis: 1.944 Cond. No. 3.67

==============================================================================

Notes:

[1] Standard Errors assume that the covariance matrix of the errors is correctly specified.

Post-survey OLS Results for Question 8 OLS Regression Results

==============================================================================

Dep. Variable: y R-squared: 0.217

Model: OLS Adj. R-squared: 0.155

Method: Least Squares F-statistic: 3.516

Date: Mon, 23 Sep 2024 Prob (F-statistic): 0.0241

Time: 18:54:30 Log-Likelihood: -42.615

No. Observations: 42 AIC: 93.23

Df Residuals: 38 BIC: 100.2

Df Model: 3

Covariance Type: nonrobust

===============================================================================

coef std err t P>|t| [0.025 0.975]

-------------------------------------------------------------------------------

Intercept 4.4169 0.229 19.274 0.000 3.953 4.881

Year -0.5629 0.368 -1.531 0.134 -1.307 0.181

Female -0.5613 0.238 -2.360 0.024 -1.043 -0.080

Rank (Fac) 0.2600 0.302 0.862 0.394 -0.351 0.871

==============================================================================

Omnibus: 4.999 Durbin-Watson: 2.070

Prob(Omnibus): 0.082 Jarque-Bera (JB): 3.736

Skew: -0.671 Prob(JB): 0.154

Kurtosis: 3.577 Cond. No. 4.93

==============================================================================

Notes:

[1] Standard Errors assume that the covariance matrix of the errors is correctly specified.

Improvement OLS Results for Question 8 OLS Regression Results

==============================================================================

Dep. Variable: y R-squared: 0.172

Model: OLS Adj. R-squared: 0.107

Method: Least Squares F-statistic: 2.634

Date: Mon, 23 Sep 2024 Prob (F-statistic): 0.0637

Time: 18:54:30 Log-Likelihood: -57.668

No. Observations: 42 AIC: 123.3

Df Residuals: 38 BIC: 130.3

Df Model: 3

Covariance Type: nonrobust

================================================================================

coef std err t P>|t| [0.025 0.975]

--------------------------------------------------------------------------------

Intercept 0.5923 0.363 1.630 0.111 -0.143 1.328

Year -0.9324 0.590 -1.580 0.122 -2.127 0.262

Rank (Fac) 0.4343 0.432 1.005 0.321 -0.440 1.309

Female (Fac) 0.2972 0.368 0.807 0.424 -0.448 1.042

==============================================================================

Omnibus: 0.560 Durbin-Watson: 1.947

Prob(Omnibus): 0.756 Jarque-Bera (JB): 0.190

Skew: -0.159 Prob(JB): 0.909

Kurtosis: 3.085 Cond. No. 5.45

==============================================================================

Notes:

[1] Standard Errors assume that the covariance matrix of the errors is correctly specified.
